# Supplementary material
Source: PubMed Central journal article supplement (PMC7489996)
Supplement: NIHMS1625152-supplement-Supplementary_Material_Figures.pdf [file NIHMS1625152-supplement-Supplementary_Material_Figures.pdf]

**Suppl. Figure 1.**

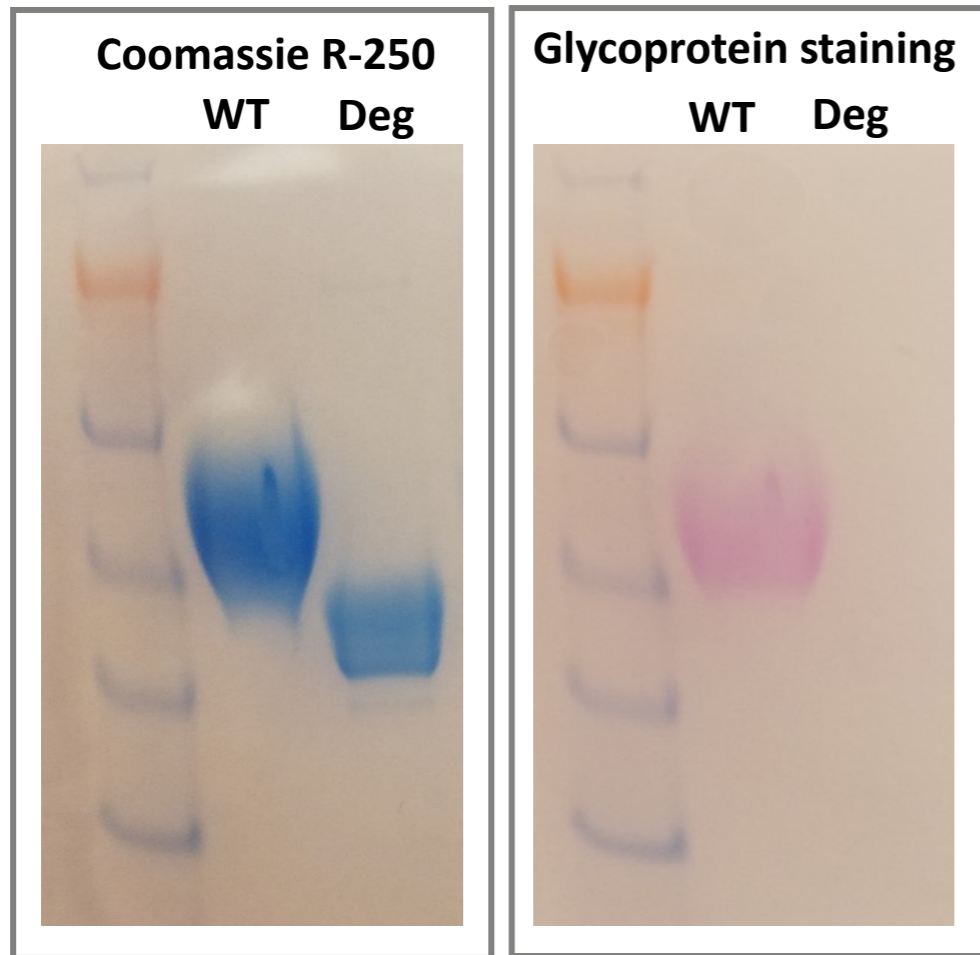

**Suppl Figure 1 SDS-PAGE analysis of human recombinant  $\beta$ 2GPI wild-type (WT) and deglycosylated mutant (Deg).** Purified proteins (25  $\mu$ g) were loaded in duplicate into a NuPAGE Novex 4 –12% Bis-Tris protein gel and run for 35 min with MES buffer. Half of the gel was stained with Coomassie Brilliant Blue R-250 to detected total protein content (left, blue color) while the other half was stained with the Pierce™ Glycoprotein Staining Kit following the manufacturing instructions (right, pink color). As expected, a pink band indicative of sugars was detected only for the WT protein but not for the mutant, which lacks glycosylations. Furthermore, the deglycosylated protein migrated much faster than the glycosylated protein, consistent with a smaller hydrodynamic radius. Proteins were overloaded on purpose to show the purify of the preparations.
